# Supplementary material for: Identification of potential prognostic small nucleolar RNA biomarkers for predicting overall survival in patients with sarcoma
Source: PubMed Central journal article supplement (PMC7541128; doi:10.1002/cam4.3361), 2020-08-11
Supplement: CAM4-9-7018-s003.pdf [file CAM4-9-7018-s003.pdf]

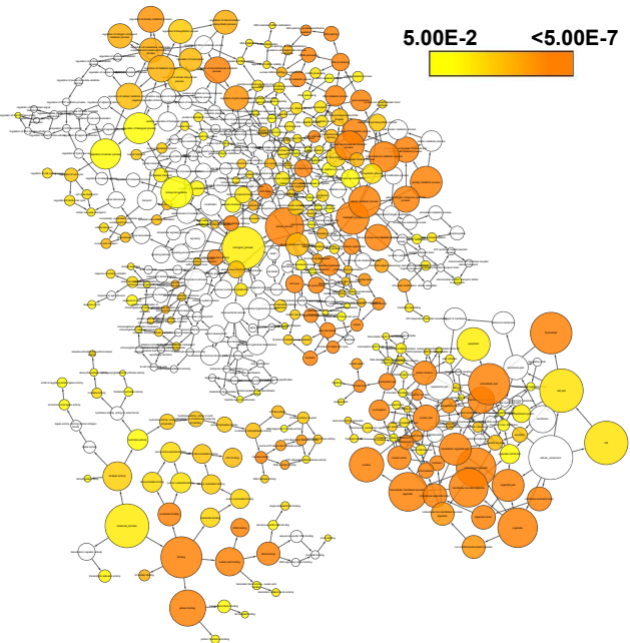

Figure S3. Directed acyclic graph of BiNGO analysis results of SNORD46 co-expression genes.
